# Supplementary material
Source: PubMed Central journal article supplement (PMC6211844)
Supplement: NIHMS978403-supplement-1.pdf [file NIHMS978403-supplement-1.pdf]

## Supplementary Figures and Legends

**a**

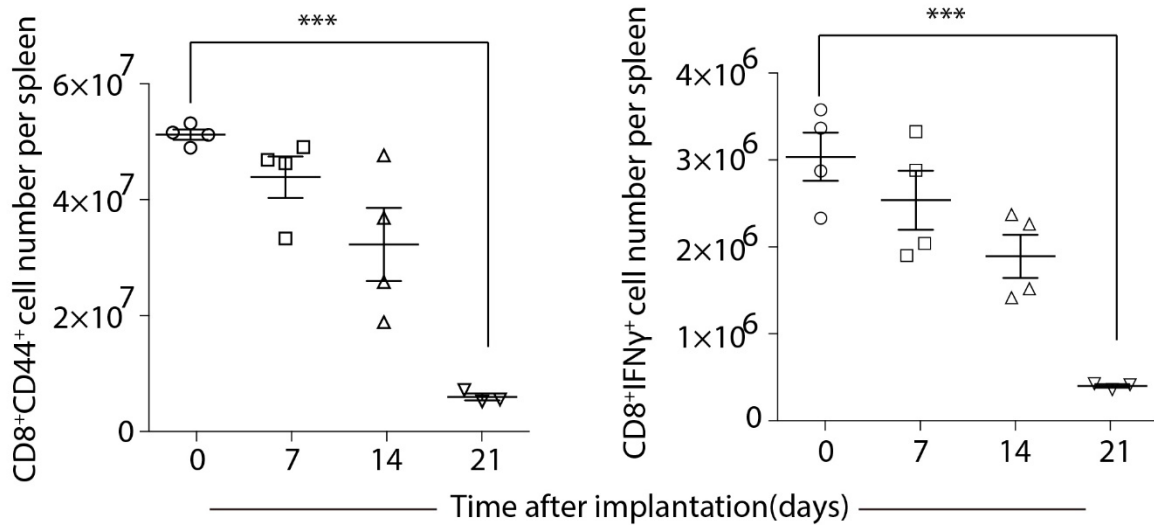

**b**

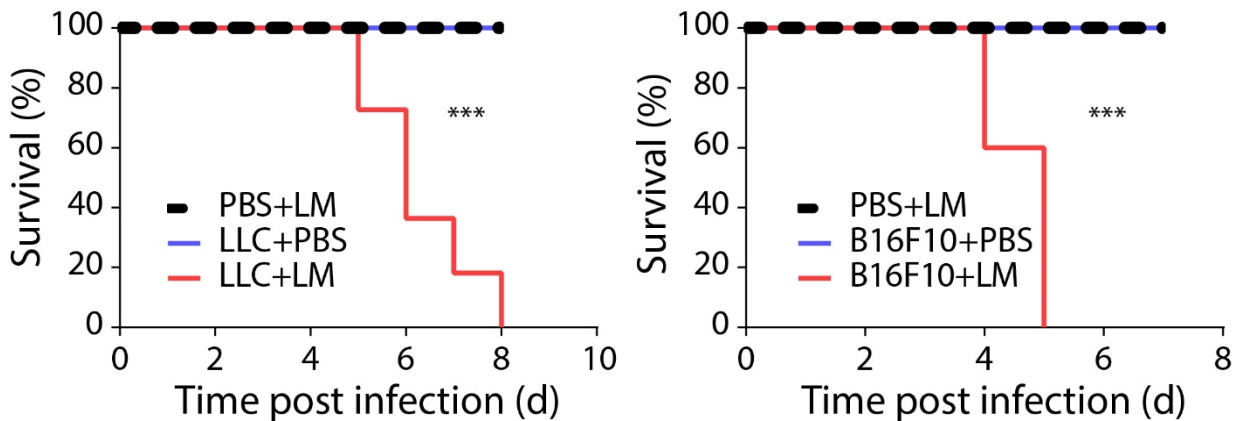

**Supplementary Fig. 1. Reduced CD8<sup>+</sup> T cell response and survival of tumor-bearing mice following viral infection.** **a**, Mice were infected with LCMV-Armstrong at different time points following LLC inoculation (0, 7, 14 and 21 days) and sacrificed on day 8 post-infection. The total numbers of CD8<sup>+</sup>CD44<sup>+</sup> T cells and IFN-γ producing CD8<sup>+</sup> T cells stimulated with viral antigen in the spleens were analyzed. **b**, 14 days after LLC cell inoculation, or 10 days after B16F10 melanoma cell inoculation, tumor-bearing mice (n=10) were infected with 2 × 10<sup>5</sup> CFU rLmOVA. Infected, non-tumor-bearing mice (n=10) and uninfected tumor-bearing mice (n=10) were used as controls. Mouse survival time was analyzed and plotted.

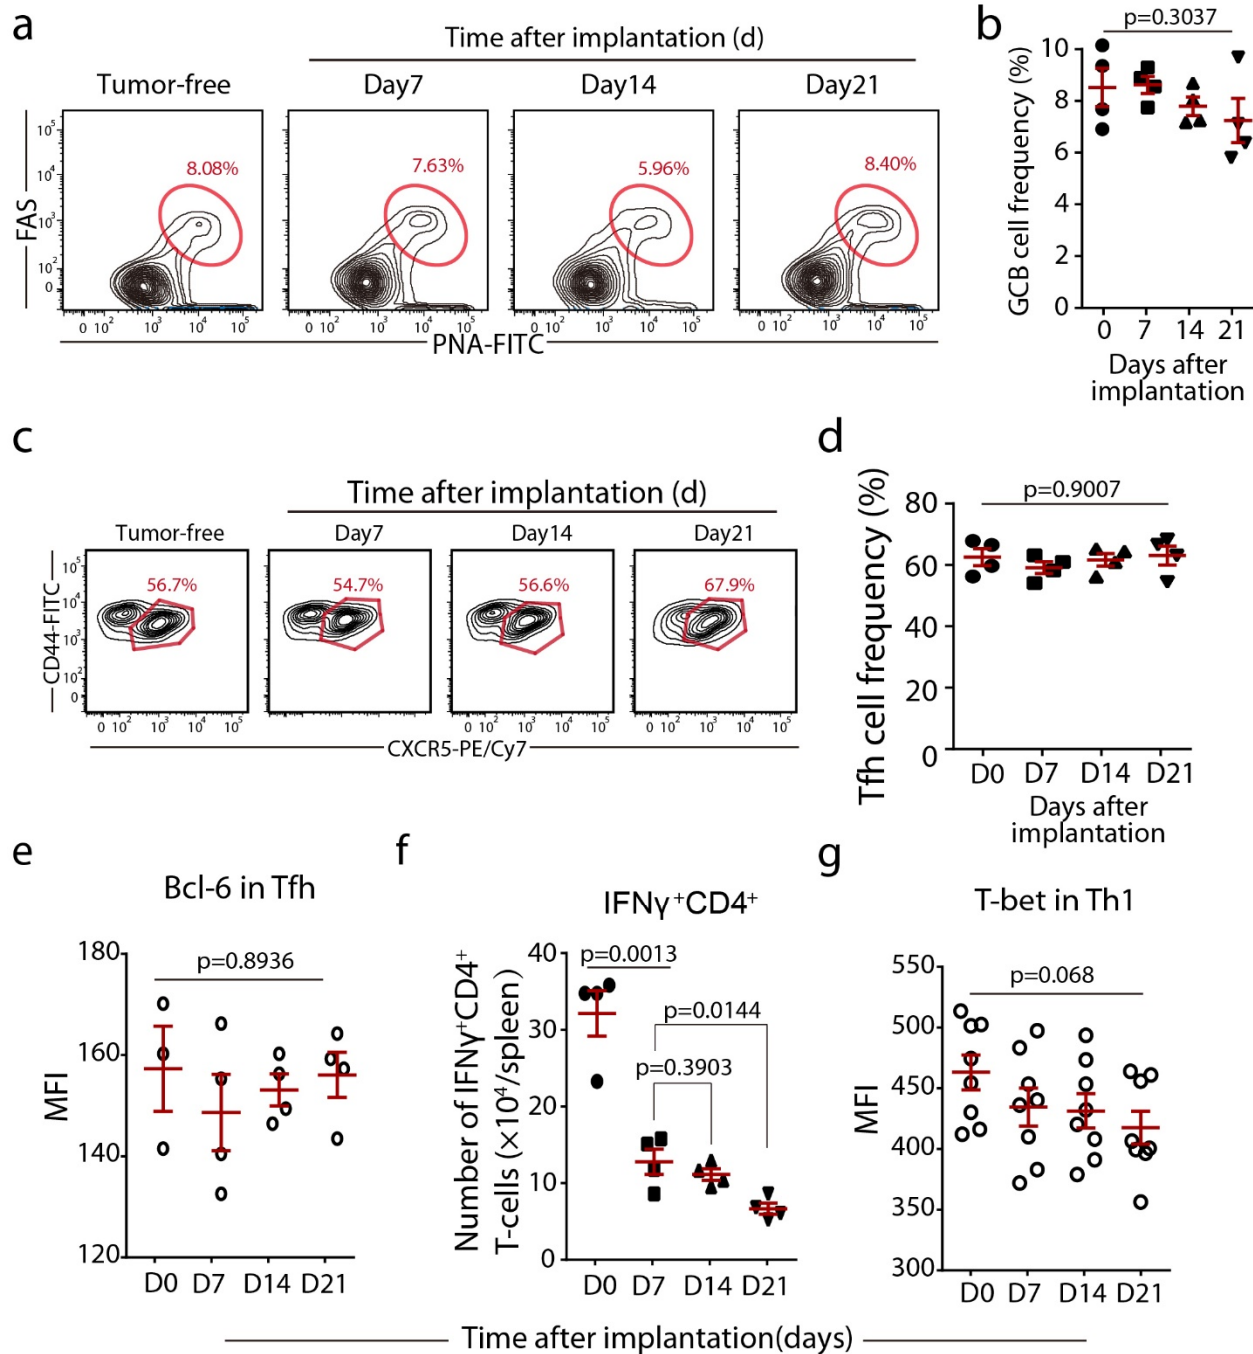

**Supplementary Fig. 2. Infection-induced differentiation of germinal center B cells and Tfh cells is not affected in tumor-bearing mice.** **a-b**, Mice were infected with LCMV-Cl13 at the indicated times after LLC inoculation and sacrificed on day 8 post-infection. Representative flow cytometry plots (**a**) and cumulative composite data (**b**) show the frequency of germinal center B cells (GCB, gated on B220) in the spleens of LCMV CL13-infected tumor-bearing mice at different time points (0, 7, 14 and 21 days,  $n=4$ ) after LLC inoculation. **c-d**, Representative flow cytometry plots (**c**) and cumulative composite data (**d**) show Tfh cell differentiation cells in spleen ( $n=4$ ). **e**, Tfh cell Bcl-6 expression in the spleens of tumor-bearing mice at the indicated time points ( $n=3$  or 4) was detected by flow cytometry. **f**, Splenocytes were collected from mice

at the indicated times (n=4) after tumor inoculation and 8 days after LCMV infection. Cells were stimulated in vitro with GP a.a.61-80 peptide, and the number of antigen-specific CD4<sup>+</sup> T cells was determined by intracellular IFN- $\gamma$  staining and flow cytometry. **g**, T-bet expression in Th1 cells in the spleens of tumor-bearing mice at the indicated time points (n=8) was determined by flow cytometry. Data are representative of at least three independent experiments. Two-tailed Student's t-tests were used for all analyses. Error bars represent the means  $\pm$  SEM.

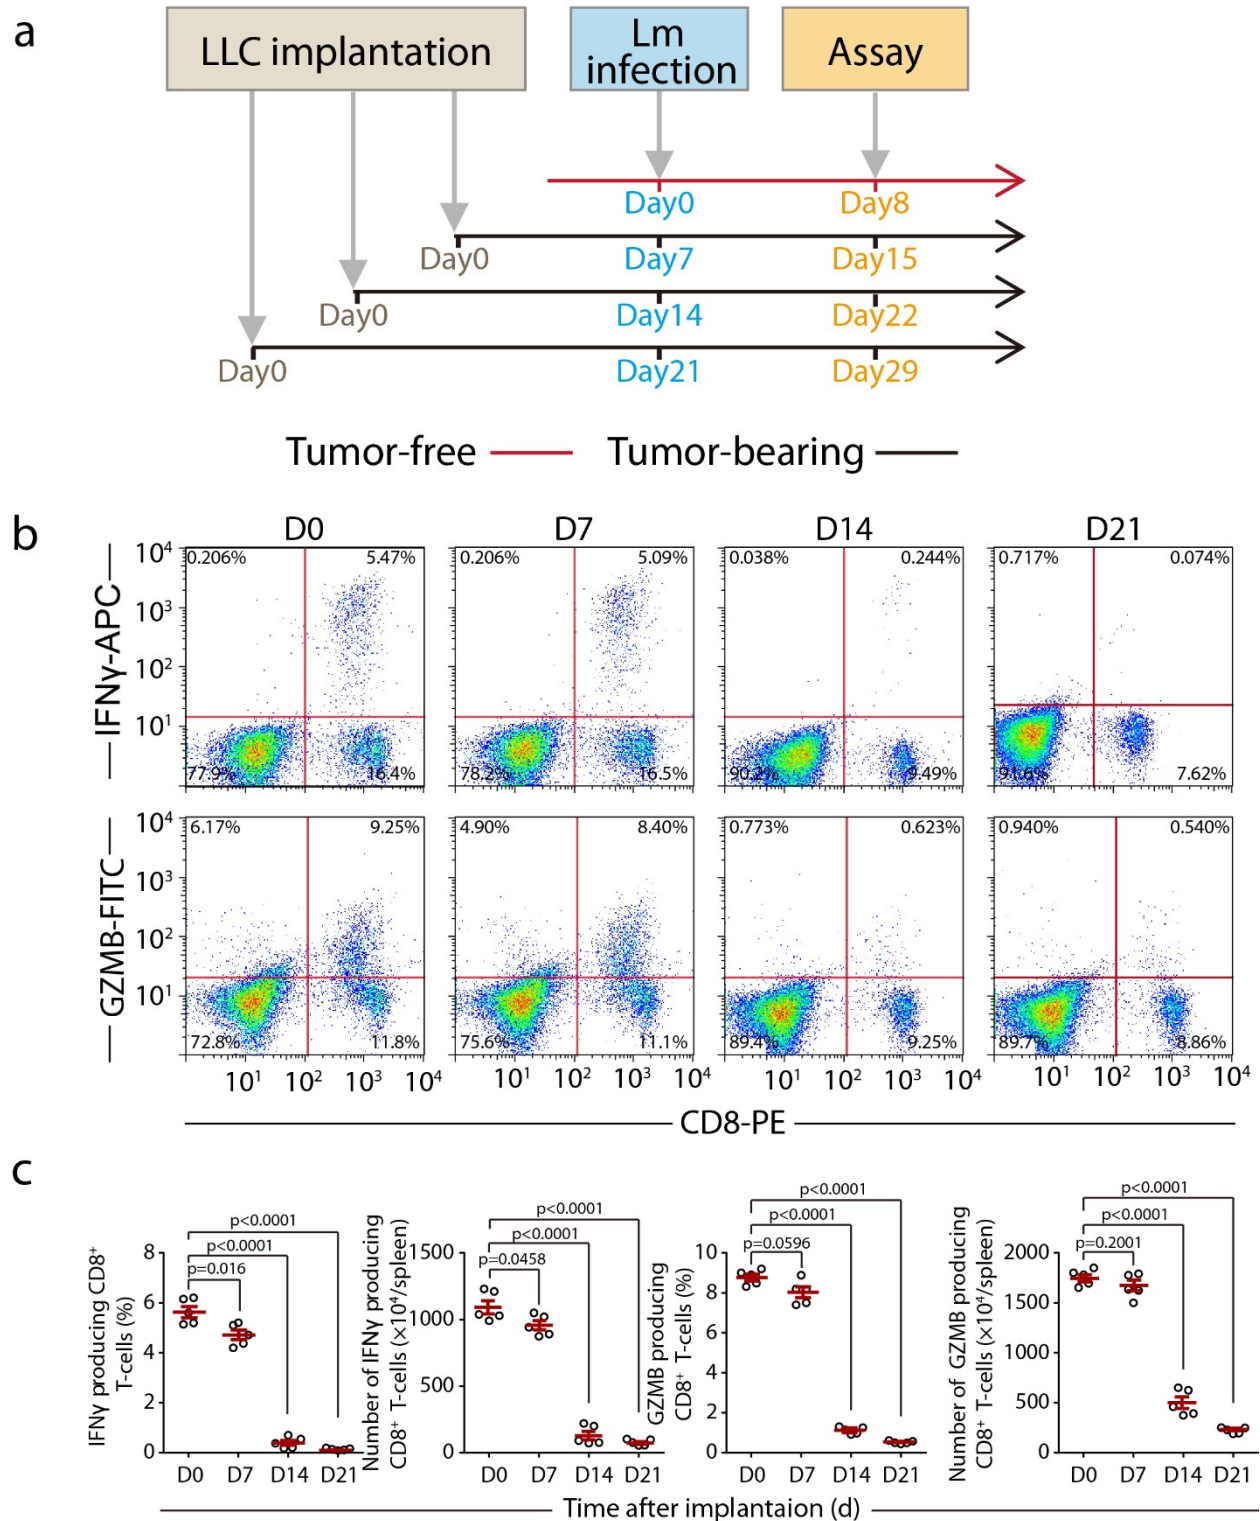

**Supplementary Fig. 3. Impaired anti-bacterial response of CD8<sup>+</sup> T cells in mice with established tumors.** **a**, Schematic of experimental procedure. Mice were infected with  $4 \times 10^6$  CFU  $\Delta$ actArLmOVA at different time points (0, 7, 14 and 21 days, n=5) after LLC inoculation and sacrificed on day 7 post-infection. **b**, Antigen-specific CD8<sup>+</sup> T cells were quantified by

staining for intracellular IFN- $\gamma$  and GzmB using flow cytometry after stimulating splenocytes with a specific OVA peptide in vitro. **c**, Frequency and absolute number of antigen-specific CD8<sup>+</sup> T cells in spleens of tumor-bearing mice. Data are representative of three independent experiments. Two-tailed Student's t-tests were used for all analyses, with the exception of survival curves, for which Gehan-Breslow-Wilcoxon tests were used.

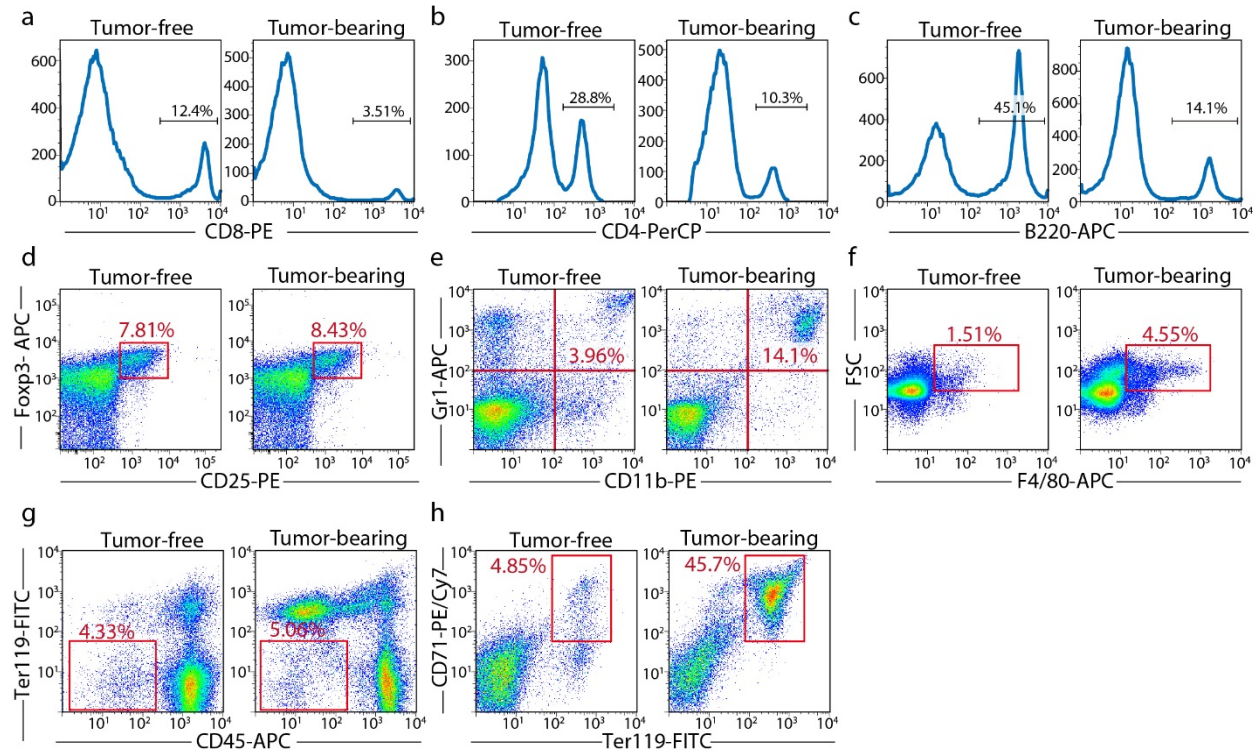

**Supplementary Fig. 4. Splenic accumulation of EPCs in tumor-bearing mice.** C57BL/6 mice were sacrificed 28 days after LLC cell inoculation, and different cell populations in the spleen were analyzed by flow cytometry. Frequencies of CD8<sup>+</sup> T (**a**), CD4<sup>+</sup> T (**b**), B cells (**c**), Tregs (**d**) MDSCs (CD11b<sup>+</sup>Gr1<sup>+</sup>, **e**), macrophages (F4/80<sup>+</sup>, **f**), stromal cells (CD45<sup>-</sup>TER119<sup>-</sup>, **g**), and EPCs (CD71<sup>+</sup>TER119<sup>+</sup>, **h**) are shown. Data are representative of at least three independent experiments.

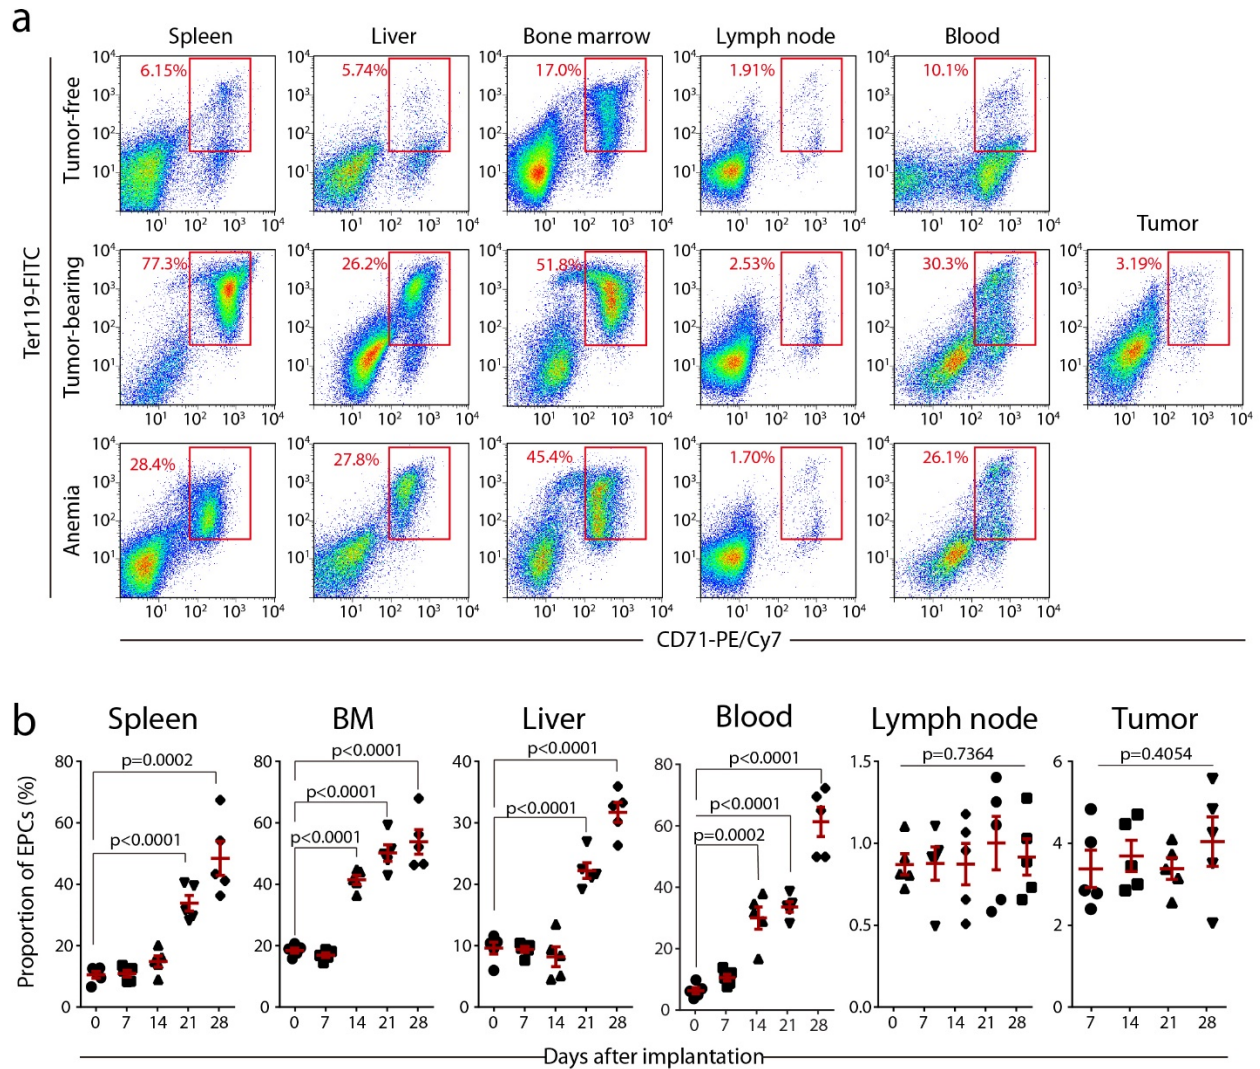

**Supplementary Fig. 5. EPC accumulation in tissues of tumor-bearing and anemic mice. a,** Representative flow cytometry results showing the frequency of CD71<sup>+</sup>TER119<sup>+</sup> cells in different tissues from control (n=5), tumor-bearing (n=5) and anemic (n=5) mice. **b,** Cumulative composite flow cytometry data show the frequency of CD71<sup>+</sup>TER119<sup>+</sup> cells in different tissues of tumor-bearing mice at different time points (n=5) after LLC cell inoculation.

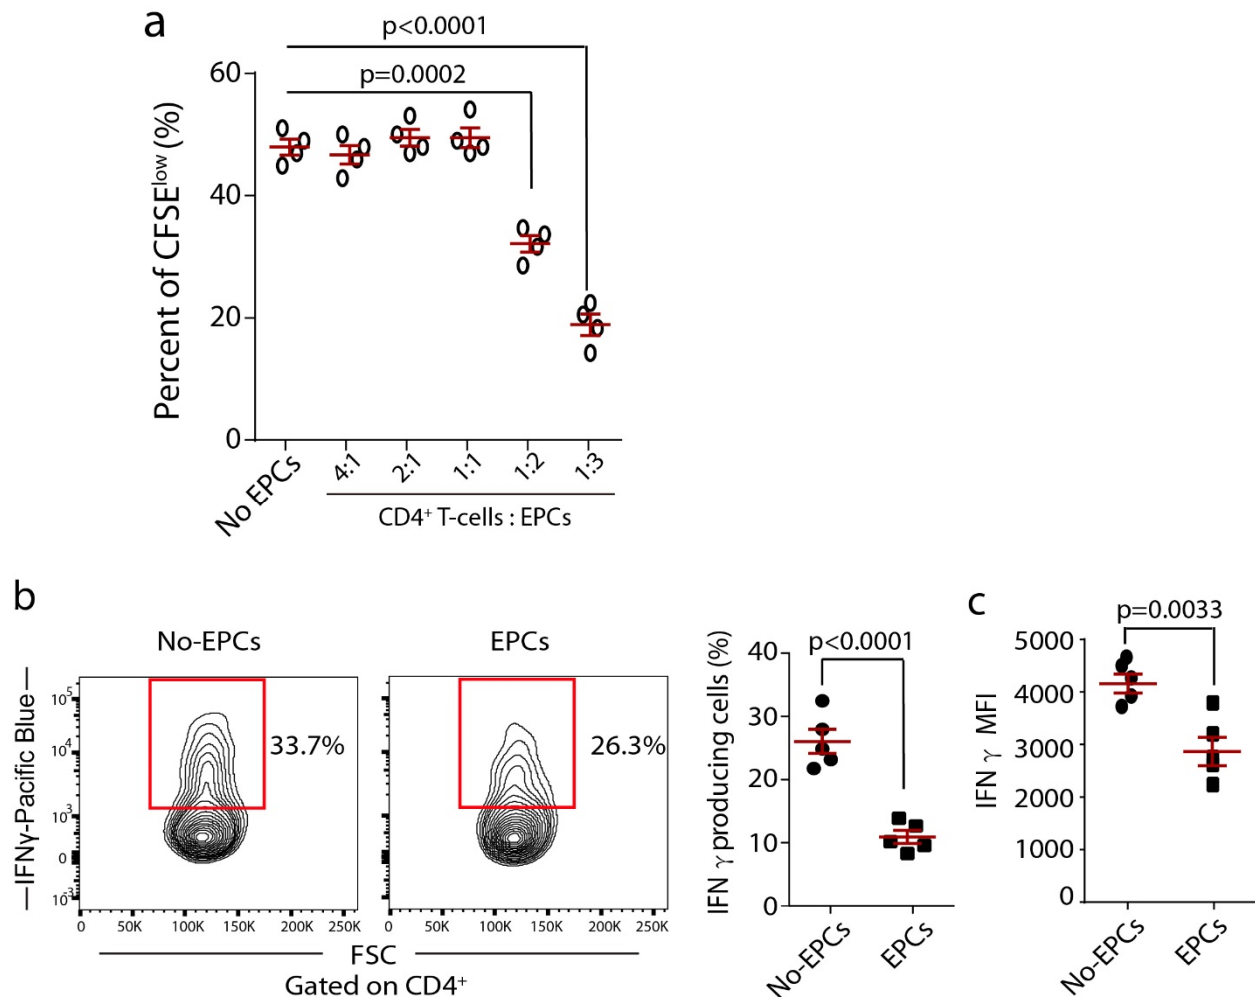

**Supplementary Fig. 6. CD71<sup>+</sup>TER119<sup>+</sup> EPCs inhibit CD4<sup>+</sup> T cell proliferation and differentiation.** **a**, CD71<sup>+</sup>TER119<sup>+</sup> EPCs isolated from the spleens of tumor-bearing mice were co-cultured with anti-CD3 and anti-CD28 antibodies, and stimulated CFSE-labeled CD4<sup>+</sup> T cells at different CD4<sup>+</sup> T cell:EPC ratios. Cumulative composite data show the proliferation of CFSE-labeled CD4<sup>+</sup> T cells(n=4). **b**, CD4<sup>+</sup> T cells purified from wild-type mice were cocultured with CD71<sup>+</sup>TER119<sup>+</sup> cells (CD4<sup>+</sup> T cell: EPC ratio 1:2) and stimulated with anti-CD3 and anti-CD28 under TH1 differentiation culture conditions. After 4 days, intracellular IFN-γ expression (gated on CD4) was determined by flow cytometry(n=5). **c**, Cumulative composite data shows the MFI of IFN-γ(n=5). Data are representative of three independent experiments and were analyzed by two-tailed unpaired t-test. Error bars denote the SEM.

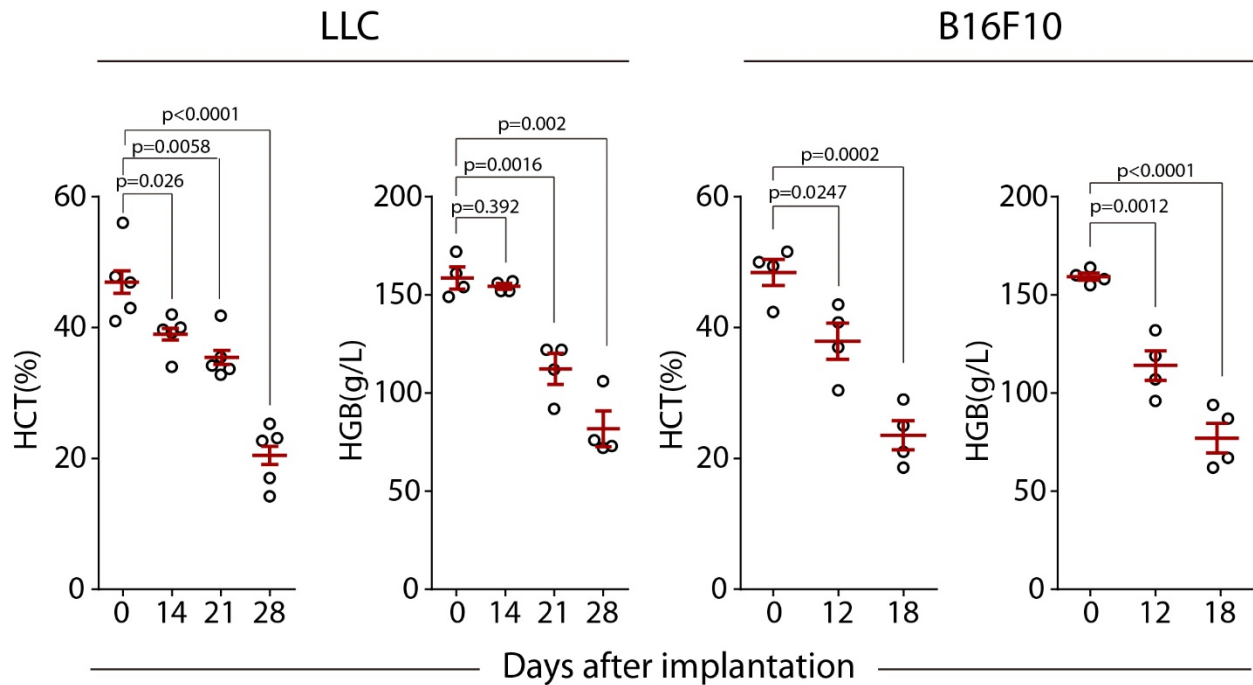

**Supplementary Fig. 7. Anemia induced by tumorigenesis.** Hematocrit (HCT) and hemoglobin (HGB) were measured in tumor-bearing mice at different time points (n=4 or 5) after LLC or B16F10 inoculation, as indicated. Each point represents data from an individual mouse, and data are representative of at least three independent experiments. Two-tailed Student's t-tests were used for all analyses. Error bars represent the means  $\pm$  SEM.



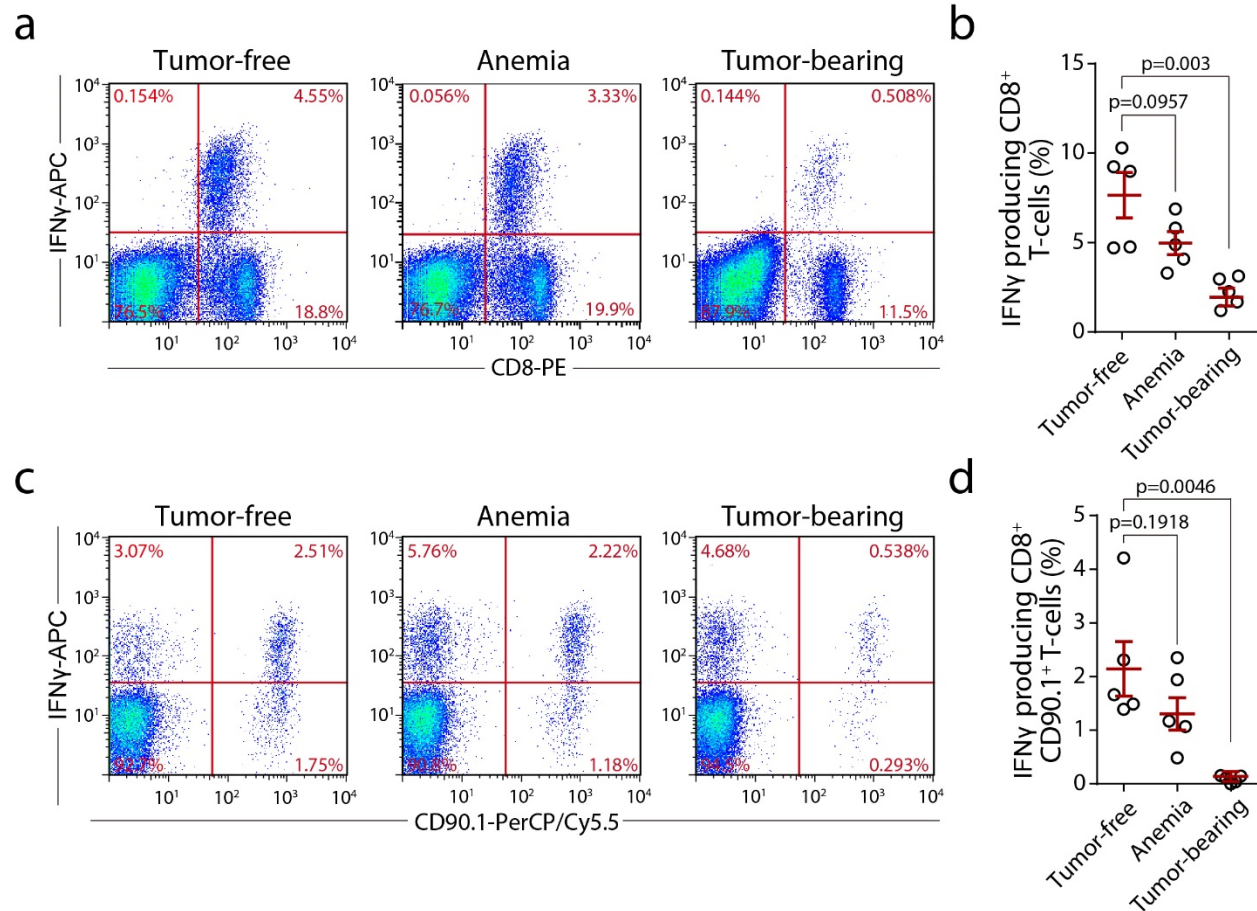

**Supplementary Fig. 8. Listeria-specific CD8<sup>+</sup> T cell responses remain intact in mice with acute anemia.** **a-b**, Mice with established tumors (21 days after LLC inoculation, n=5), acute anemia (n=5), or healthy control mice (n=5) were infected with  $\Delta$ actArLmOVA. Antigen-specific CD8<sup>+</sup> T cells were measured by flow cytometric analysis of intracellular IFN- $\gamma$  in spleen cells on day 7 post infection after stimulating splenocytes with OVA peptide *in vitro*. **c-d**, Mice with established tumors (21 days after LLC inoculation, n=5), acute anemia (n=5) or control healthy mice (n=5) were intravenously injected with equal numbers of CD90.1<sup>+</sup>CD8<sup>+</sup> OT-1 cells. Six hours after OT-1 transfer, mice were infected with Lm. Splenocytes were harvested on day 7 post-infection and stimulated with OVA peptide *in vitro*. IFN- $\gamma$ -producing CD90.1<sup>+</sup>CD8<sup>+</sup> OT-1 cells were quantified by flow cytometry. Data are representative of at least three independent experiments. Two-tailed Student's t-tests were used for all analyses. Error bars represent the means  $\pm$  SEM.

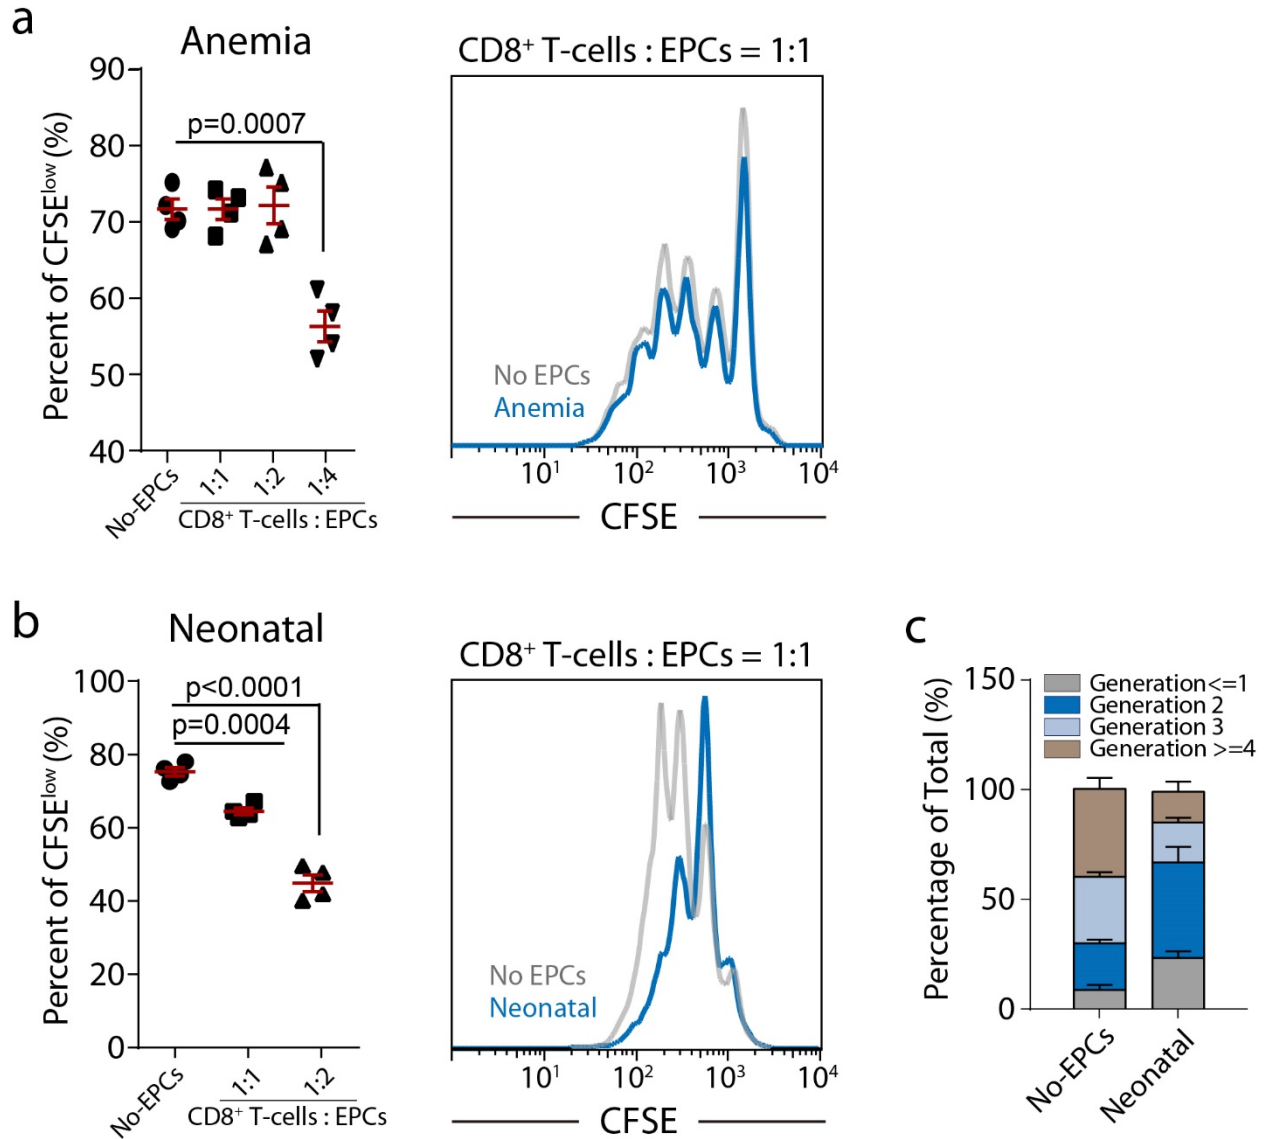

**Supplementary Fig. 9. Differential suppressive capacity of CD71<sup>+</sup>TER119<sup>+</sup> EPCs isolated from acutely anemic and neonatal mice.** a-b, CD71<sup>+</sup>TER119<sup>+</sup> EPCs isolated from the spleens of anemic (a) and neonatal (b) mice were co-cultured at different CD8<sup>+</sup>T cell:EPC ratios with CFSE-labeled CD8<sup>+</sup> T cells that were stimulated with CD3 and CD28 antibodies (n=4). Representative flow cytometry results and cumulative composite data show the proliferation of CFSE-labeled CD8<sup>+</sup> T cells. Data are representative of at least three independent experiments. Two-tailed Student's t-tests were used for all analyses. Error bars represent the means  $\pm$  SEM.

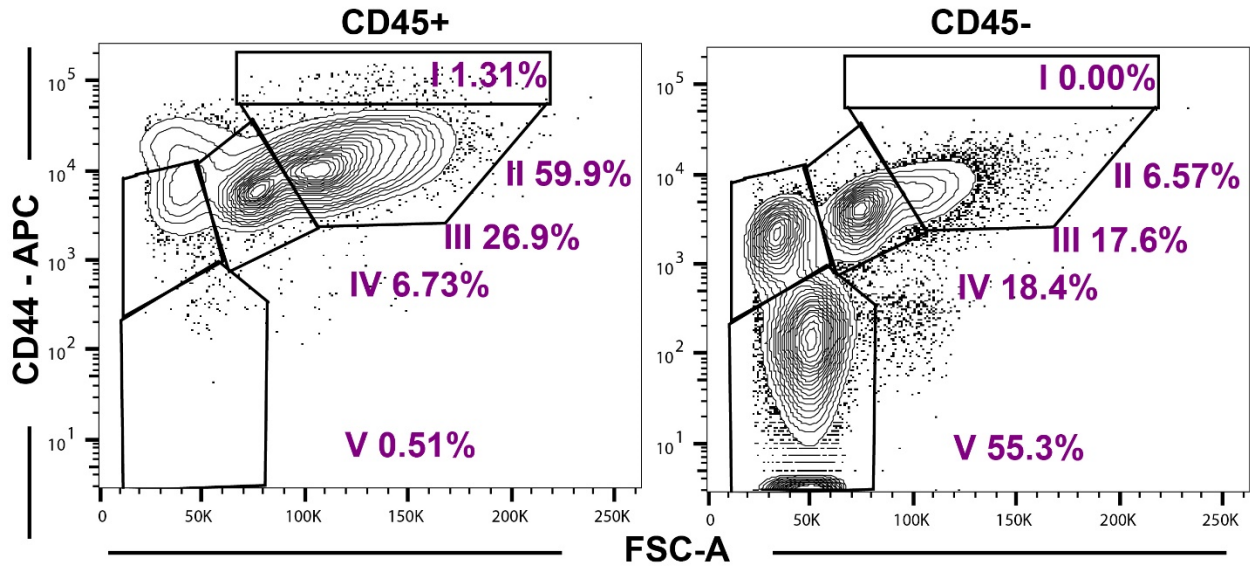

**Supplementary Fig. 10. CD45<sup>+</sup> EPCs are at the earlier developmental stages than CD45<sup>-</sup> ones.**  $1 \times 10^6$  Lewis lung cancer cells (LLCs) were subcutaneously inoculated into C57BL/6 mice to allow for tumor formation. At day 21 post-inoculation, tumor-bearing mice were sacrificed and spleens were analyzed by FACS. Ter119<sup>+</sup>CD71<sup>+</sup> cells were separated as CD45<sup>+</sup> and CD45<sup>-</sup> subpopulations and plotted as CD44 versus FSC. As defined by Chen et al., the developmental stages of erythroid cells from I (progenitor) to V (fully differentiated red blood cells)<sup>1</sup> were displayed.

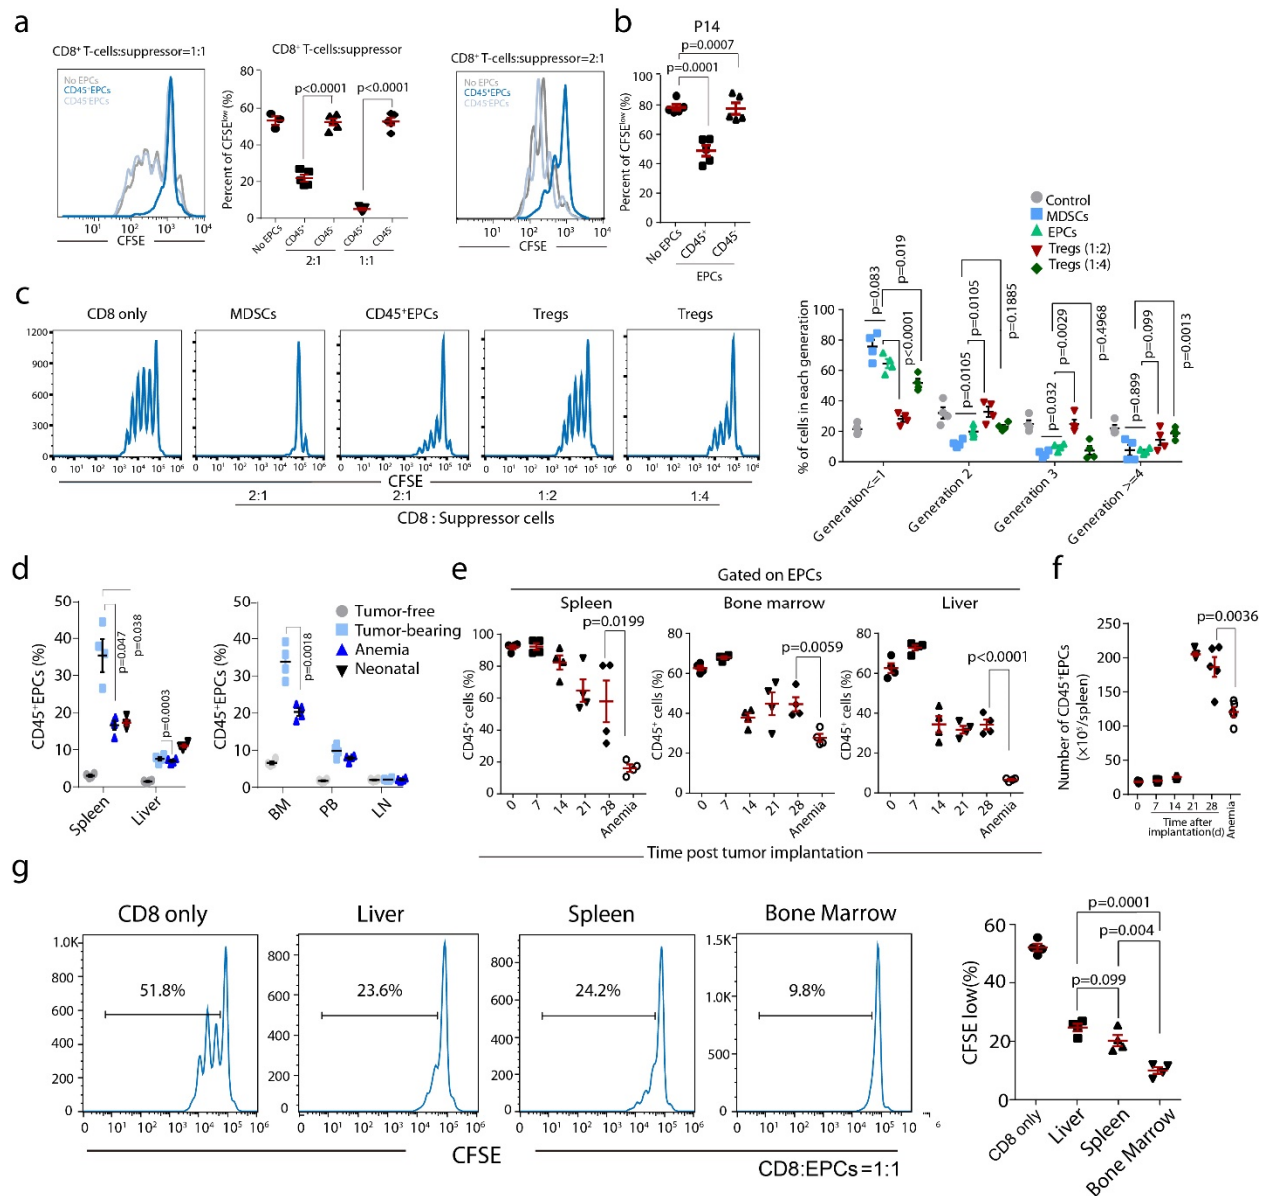

**Supplementary Fig. 11. Immunosuppressive CD45<sup>+</sup> early EPCs uniquely accumulate in tumor-bearing mice.** **a**, Proliferation of CFSE-labeled CD8<sup>+</sup> T cells in response to anti-CD3 and anti-CD28 was analyzed after co-culture with CD45<sup>+</sup>CD71<sup>+</sup>TER119<sup>+</sup> or CD45<sup>-</sup>CD71<sup>+</sup>TER119<sup>+</sup> cells isolated from the spleens of tumor-bearing mice at different CD8<sup>+</sup> T cell:EPC ratios (n=5). **b**, CD45<sup>+</sup>CD71<sup>+</sup>TER119<sup>+</sup> and CD45<sup>-</sup>CD71<sup>+</sup>TER119<sup>+</sup> EPCs isolated from the spleens of tumor-bearing mice were co-cultured with CFSE-labeled P14 splenic cells, which were stimulated with a specific peptide, at a ratio of 2:1 (P14 cells:EPCs). Proliferation of CFSE-labeled CD8<sup>+</sup> T cells (gated on CD8<sup>+</sup> P14 cells) was then analyzed (n=5). **c**, Proliferative capacity of CFSE-labeled CD8<sup>+</sup> T cells in response to anti-CD3 and anti-CD28 was analyzed after co-culture with CD45<sup>+</sup>CD71<sup>+</sup>TER119<sup>+</sup> EPCs, MDSCs or Tregs isolated from the spleen of tumor-bearing mice (day 21) at CD8<sup>+</sup> T cell:suppressor cell ratios as indicated in the figure (n=4). Two-tailed unpaired t-test of three independent experiments was performed by measuring the distribution of CD8<sup>+</sup> T cells in each division. **d**, Frequency of CD45<sup>+</sup>CD71<sup>+</sup>TER119<sup>+</sup> cells in spleen (SPL),

peripheral blood (PB), bone marrow (BM), lymph node (LN) and liver (HEP) for control, tumor-bearing, neonatal and anemic mice (n=4). **e**, Cumulative composite flow cytometry data show the frequencies of CD45<sup>+</sup> cells within the CD71<sup>+</sup>TER119<sup>+</sup> cell population in different tissues of anemic and tumor-bearing mice at the indicated times (n=4) after LLC inoculation. **f**, Cumulative composite data show the total number of CD45<sup>+</sup>CD71<sup>+</sup>TER119<sup>+</sup> cells in the spleens of tumor-bearing and anemic mice(n=5). **g**, Proliferative capacity of CFSE-labeled CD8<sup>+</sup> T cells in response to anti-CD3 and anti-CD28 antibody stimulation was analyzed after co-culture with CD45<sup>+</sup>CD71<sup>+</sup>TER119<sup>+</sup> EPCs isolated from spleens of healthy control or tumor-bearing mice (n=5) at days 21 and 28 (CD8<sup>+</sup> T cell:EPC ratio of 2:1). Data are representative of at least three independent experiments. Two-tailed Student's t-tests were used for all analyses. Error bars represent the means  $\pm$  SEM.

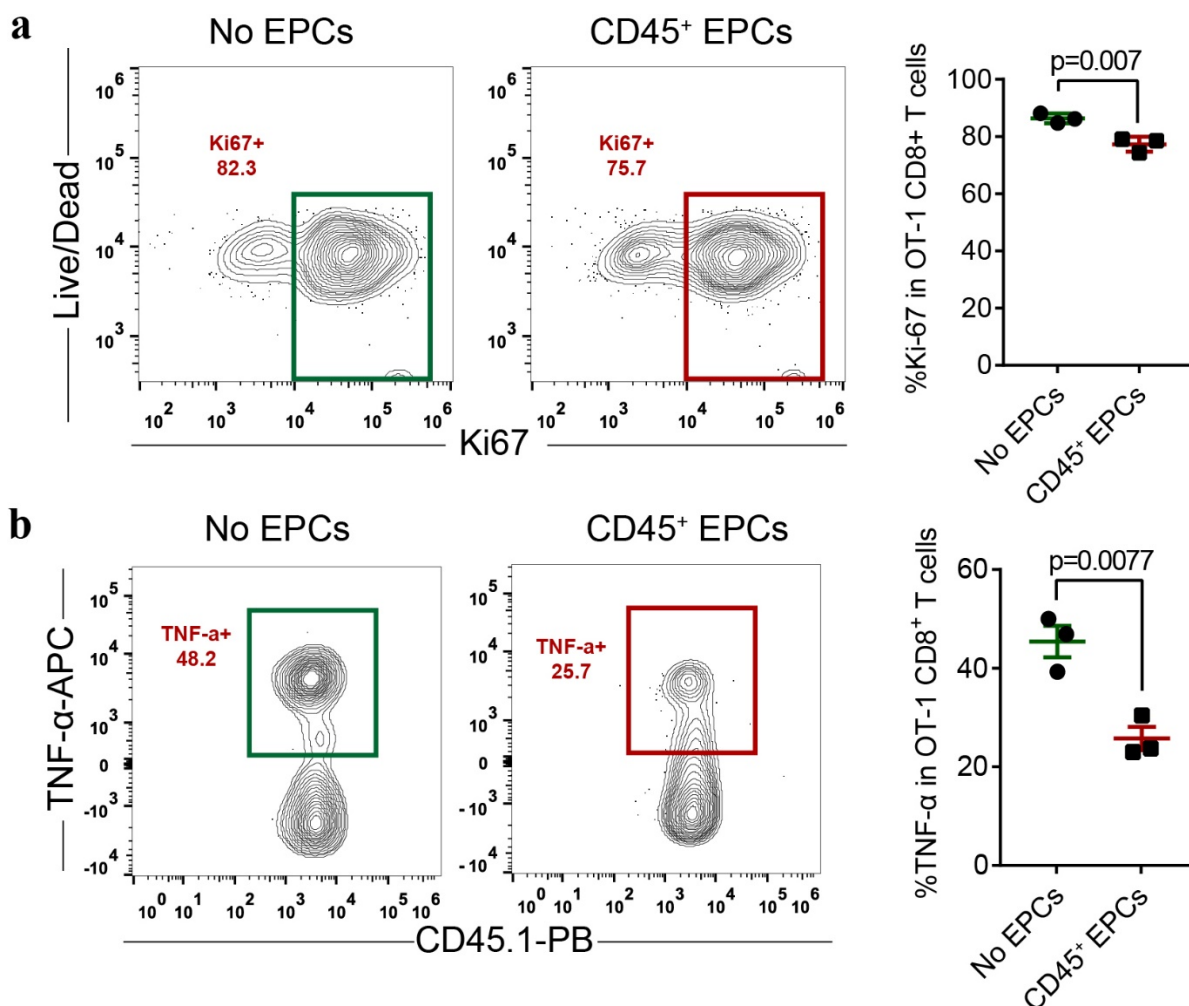

**Supplementary Fig. 12. CD45<sup>+</sup> EPCs suppress tumor-specific CTL responses *in vivo*.** A total of  $2 \times 10^5$  B16-OVA melanoma cells were subcutaneously transplanted into CD45.2<sup>+</sup> C57BL/6 mice. At day 10 post tumor inoculation, mice were intravenously injected with  $2 \times 10^5$  CD45.1<sup>+</sup>CD8<sup>+</sup> OT-I cell mixed with either PBS or  $2 \times 10^6$  CD45<sup>+</sup> EPCs purified from other tumor-bearing mice. Mice were sacrificed at day 5 after OT-I transfer and splenocytes were

isolated and restimulated with OVA<sub>257-264</sub> peptide for 5 hours. The proliferative capacity of transferred OT-I cells was assessed by Ki67 staining (**a**) and their cytotoxicity was measured by intracellular TNF- $\alpha$  staining (**b**). Representative flow cytometry data (**left**) and the statistical analysis of mean frequencies (**right**) are presented. Data are collected from three mice (n=3). Two-tailed Student's t-tests were used for all analyses.

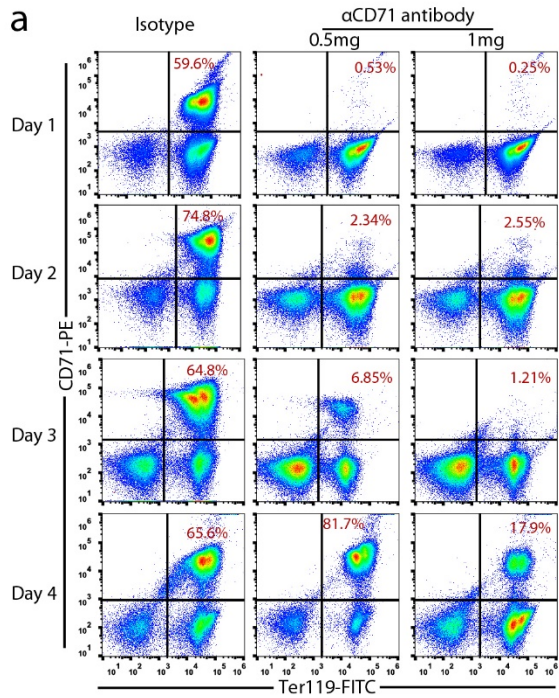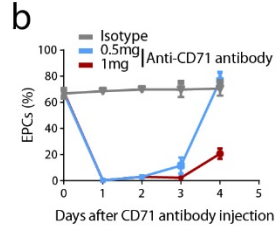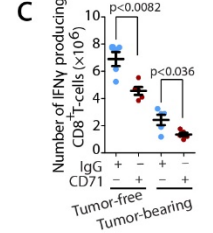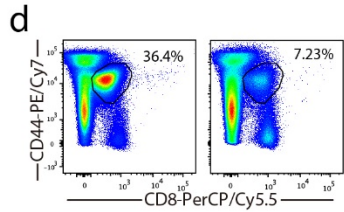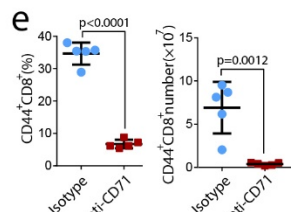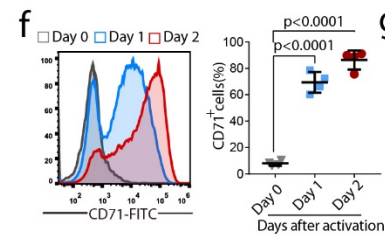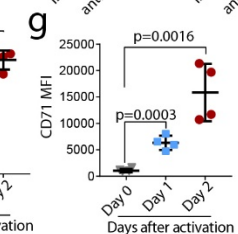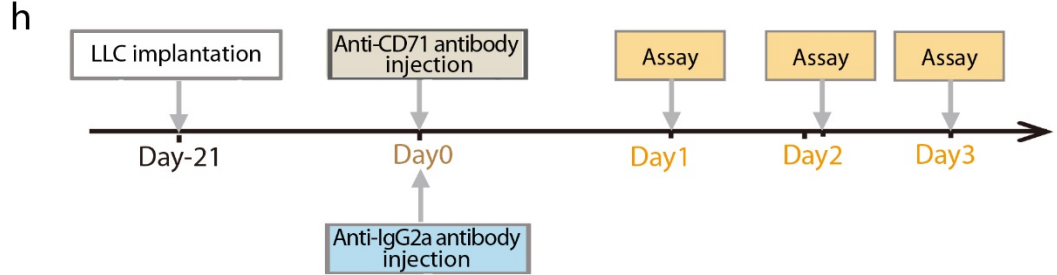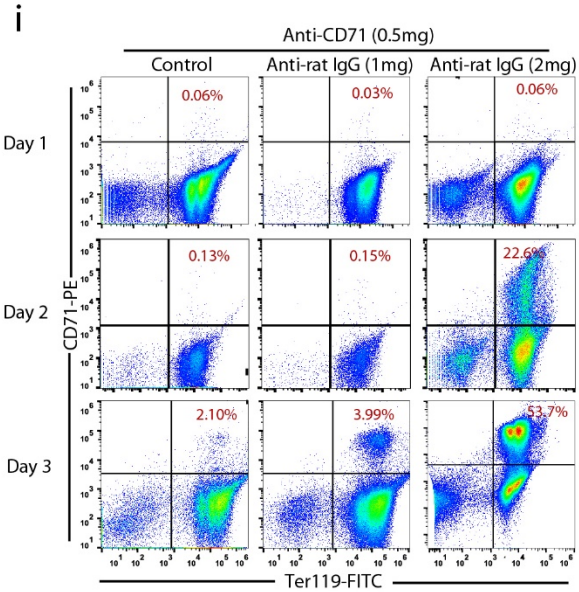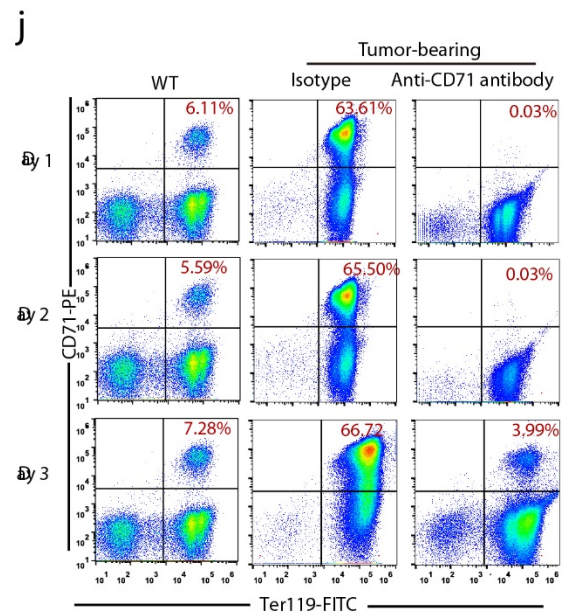

**Supplementary Fig. 13. Specific depletion of CD71<sup>+</sup> EPCs.**  $1 \times 10^6$  LLC cells were subcutaneously injected into C57BL/6 mice at day 0 and different doses of anti-CD71 deletion antibody was injected intravenously at day 21 after tumor cell inoculation (IgG was used as control). Frequencies of CD71<sup>+</sup>TER119<sup>+</sup> cells in peripheral blood were detected by flow cytometry at different days after antibody administration. Representative flow cytometry **(a)** and cumulative composite data **(b)** show the frequency of CD71<sup>+</sup>TER119<sup>+</sup> cells in peripheral blood. Mice were infected with LCMV at day 21 following LLC inoculation and anti-CD71 deletion antibody or control IgG was injected intravenously at days 21 and 24 after LLC inoculation. Mice were sacrificed on day 8 post-LCMV infection. Cumulative composite data show the number of CD8<sup>+</sup>IFN $\gamma$ <sup>+</sup> cells in spleen(n=5) **(c)**. C57BL/6 mice infected with LCMV were intravenously injected with anti-CD71 deletion antibody or control IgG on days 0 and 4 after LCMV infection. Mice were sacrificed on day 8 post-LCMV infection(n=5). Representative flow cytometry **(d)** and cumulative composite data **(e, n=5)** show the frequency and number of CD8<sup>+</sup>CD44<sup>+</sup> cells in spleen. CD8<sup>+</sup> T cells were isolated and cultured in vitro in the presence of anti-CD3 and anti-CD28. The frequency of CD71<sup>+</sup> cells among CD8<sup>+</sup>CD44<sup>+</sup>T cells was detected by flow cytometry at the indicates days after entering culture. Representative flow cytometry and cumulative composite data **(f, n=4)** are shown. CD71 MFI of CD8<sup>+</sup>CD44<sup>+</sup>T cells was analyzed **(g, n=4)**.  $1 \times 10^6$  LLC cells were subcutaneously injected into C57BL/6 mice (PBS was used as control). Anti-CD71 deletion antibody or control IgG was intravenously injected at day 21 after tumor cell inoculation. To attenuate the anti-CD71 deletion antibody, different doses of anti-IgG2a antibody were intravenously injected at the same time **(h)**. The frequency of CD71<sup>+</sup>TER119<sup>+</sup> cells in peripheral blood was detected by flow cytometry at the indicated times after antibody administration **(i)**.  $1 \times 10^6$  LLC cells were subcutaneously injected into C57BL/6 mice (PBS was used as control). Anti-CD71 deletion antibody (1 mg/mouse) was intravenously injected at day 21 after tumor cell inoculation (IgG was used as control, 1 mg/mouse). To attenuate the anti-CD71 deletion antibody, anti-IgG2a antibody (3 mg/mouse) was intravenously injected 12h later. Then, we adoptively transferred P14 CD8<sup>+</sup> T cells (CD90.1,  $2 \times 10^6$  cells/mouse) and infected mice with LCMV c113 simultaneously 12 h after administration of anti-IgG2a antibody. All mice were sacrificed on day 2 after LCMV infection**(j)**. Representative flow cytometry data shows deletion efficiency of the anti-CD71 antibody **(k)**.



**a**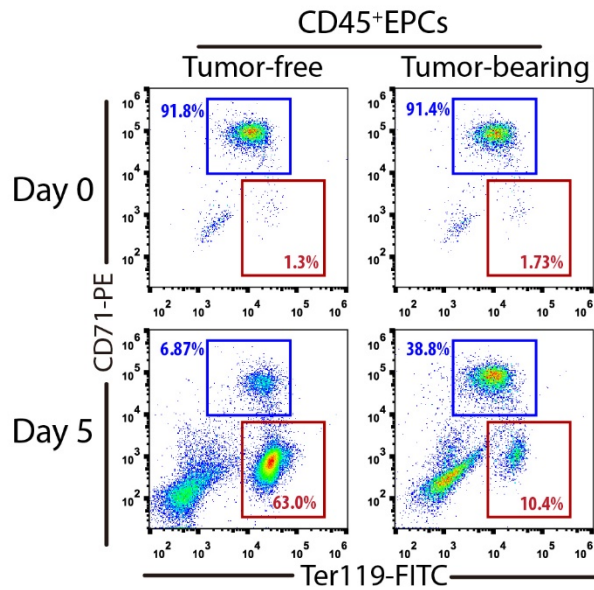**b**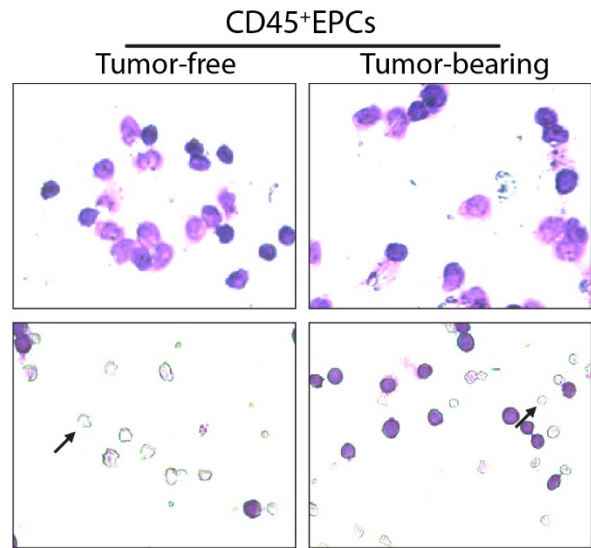

**Supplementary Fig. 14. CD45<sup>+</sup>CD71<sup>+</sup>TER119<sup>+</sup> EPCs differentiate into mature RBCs.** CD45<sup>+</sup>CD71<sup>+</sup>TER119<sup>+</sup> EPCs were isolated by flow cytometry from tumor-bearing or healthy control mice and cultured in vitro under conditions that promote erythroid differentiation. Representative flow cytometry (a) and morphology (b) data. Giemsa staining shows erythroid differentiation at days 0 and 5 of culture (b).

**a** Erythrocyte development pathway (BIOCARTA database)

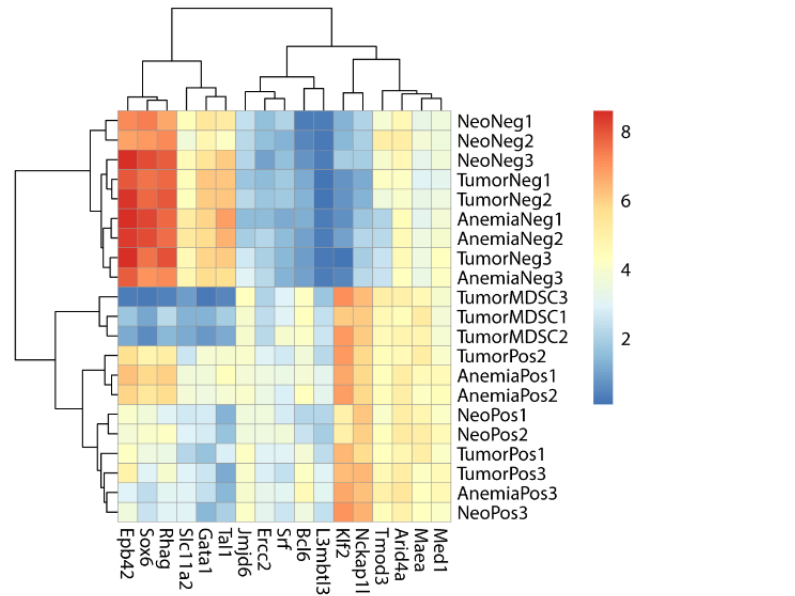

**b** Immune signature of MDSC

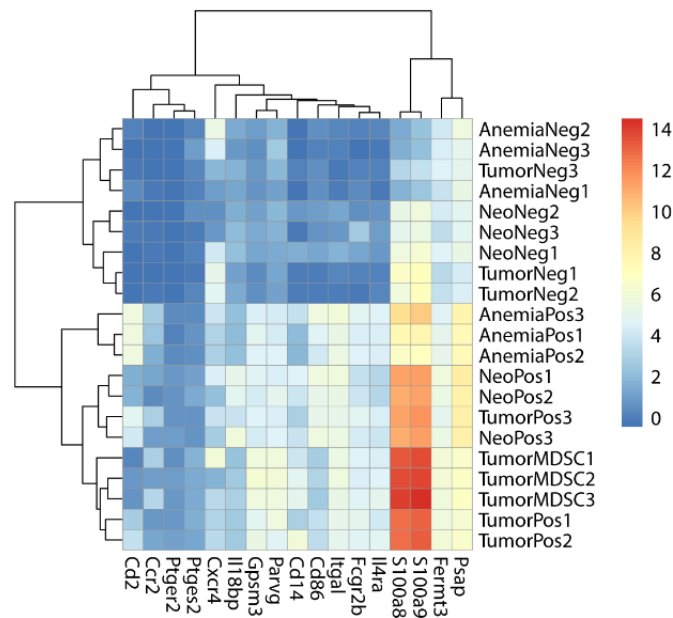

**Supplementary Fig. 15. Transcriptome signatures to characterize EPC physiological and pathological origins.** To categorize the differentiation and functional potential of EPCs, signature gene panels for erythroid differentiation (**a**) and MDSC function (**b**) were extracted from the RNAseq data set (Fig. 3a-b). Unsupervised clustering was performed on splenic CD45<sup>+</sup> and CD45<sup>-</sup> EPCs purified from neonatal, acutely anemic and tumor-bearing mice. MDSCs purified from spleens of tumor-bearing mice are included as a reference.

## Supplementary Tables

**Supplementary Table 1.** Clinical information for the 167 cancer patients with different types of malignant tumors used in the EBV infection study (Fig. 4e-g).

| No. | ID       | Age | Gen<br>der | Diagnosis                                         | Hb<br>(g/L) | EBV<br>(copies/ml) | Stage   |
|-----|----------|-----|------------|---------------------------------------------------|-------------|--------------------|---------|
| 1   | 07895013 | 46  | M          | Nasopharyngeal carcinoma                          | 176         | 851                | III     |
| 2   | 07195985 | 68  | M          | Small cell lung cancer                            | 110         | <400               | Limited |
| 3   | 07825720 | 77  | F          | Breast cancer                                     | 101         | 643                | III     |
| 4   | 05337039 | 62  | F          | Small cell lung cancer                            | 96          | <400               | Limited |
| 5   | 05337039 | 52  | M          | Small cell lung cancer                            | 66          | 6300               | Limited |
| 6   | 05991279 | 60  | F          | Breast cancer                                     | 116         | <400               | III     |
| 7   | 06003668 | 60  | M          | Non-small cell lung cancer                        | 94          | 434                | III     |
| 8   | 00969251 | 62  | M          | Lung adenocarcinoma                               | 130         | <400               | rIV     |
| 9   | 07648115 | 52  | F          | Rectum cancer                                     | 126         | <400               | rIV     |
| 10  | 05732953 | 66  | M          | Primary bronchogenic lung squamous cell carcinoma | 71          | 603                | III     |
| 11  | 06055174 | 16  | F          | Breast cancer                                     | 107         | 500                | III     |
| 12  | 05895075 | 13  | M          | Pineaal tumor                                     | 113         | <400               | III     |
| 13  | 06034647 | 40  | F          | Breast cancer                                     | 147         | <400               | IV      |
| 14  | 05690867 | 59  | F          | Breast cancer                                     | 96          | 463                | rIV     |
| 15  | 07659165 | 61  | M          | Esophageal squamous cell cancer                   | 107         | 411                | III     |
| 16  | 07853447 | 73  | M          | Nasopharyngeal squamous cell cancer               | 132         | <400               | IV      |
| 17  | 07062881 | 62  | M          | Colon cancer                                      | 115         | <400               | III     |
| 18  | 07535817 | 41  | F          | Colon cancer                                      | 110         | <400               | III     |
| 19  | 03415090 | 61  | F          | Breast cancer                                     | 102         | <400               | rIV     |
| 20  | 07198192 | 69  | M          | Laryngeal squamous cell cancer                    | 127         | 776                | III     |
| 21  | 04980245 | 54  | M          | Lung squamous cell carcinoma                      | 135         | 800                | IIIA    |
| 22  | 07843380 | 59  | F          | Esophageal squamous cell cancer                   | 115         | <400               | III     |
| 23  | 04940642 | 50  | M          | Nasopharyngeal squamous cell cancer               | 82          | <400               | III     |
| 24  | 07821594 | 60  | F          | Cervical squamous cell carcinoma                  | 99          | 615                | III     |
| 25  | 07894165 | 58  | F          | Rectal caner                                      | 133         | <400               | IV      |
| 26  | 05903285 | 36  | F          | Ovarian cancer                                    | 129         | <400               | III     |
| 27  | 05679620 | 64  | M          | Lung squamous cell carcinoma                      | 104         | 410                | IIIb    |
| 28  | 07867140 | 71  | F          | Cardia adenocarcinoma                             | 113         | 550                | III     |
| 29  | 05153701 | 42  | F          | Lung adenocarcinoma                               | 108         | <400               | IV      |
| 30  | 07811161 | 41  | M          | Nasopharyngeal squamous cell                      | 110         | 496                | IV      |
| 31  | 05612175 | 62  | M          | Tongue cancer                                     | 103         | 420                | IV      |
| 32  | 04929706 | 59  | F          | Primary bronchial adenocarcinoma of the lung      | 113         | <400               | IV      |
| 33  | 07855681 | 33  | M          | Primary bronchial adenocarcinoma of the lung      | 123         | <400               | III     |
| 34  | 07680469 | 67  | M          | Tongue cancer                                     | 137         | <400               | III     |
| 35  | 07895124 | 64  | M          | Lung cancer                                       | 66          | 4370               | III     |
| 36  | 06005611 | 24  | M          | Tongue squamous cell carcinoma                    | 120         | <400               | III     |
| 37  | 07759139 | 39  | M          | Nasopharyngeal squamous cell                      | 123         | <400               | IIIA    |
| 38  | 07903245 |     | M          | Colon cancer                                      | 128         | <400               | IV      |

|    |          |    |   |                                                   |     |      |           |
|----|----------|----|---|---------------------------------------------------|-----|------|-----------|
| 39 | 07847305 | 74 | M | Primary bronchial small cell lung cancer          | 103 | 1170 | IIIB      |
| 40 | 07638833 | 58 | M | Colon cancer                                      | 110 | <400 | III       |
| 41 | 07837029 | 47 | M | Primary bronchogenic lung squamous cell carcinoma | 116 | <400 | III       |
| 42 | 07900061 | 14 | F | Small cell lung cancer                            | 132 | 1000 | Extensive |
| 43 | 07579757 | 58 | M | Small cell lung cancer                            | 112 | <400 | Limited   |
| 44 | 05752348 | 56 | F | Cervical squamous cell carcinoma                  | 132 | 790  | III       |
| 45 | 03949479 | 44 | M | Pelvic malignancy                                 | 109 | <400 | IV        |
| 46 | 07703736 | 65 | F | Cervical squamous cell carcinoma                  | 97  | <400 | IV        |
| 47 | 07897540 | 48 | F | Cervical squamous cell carcinoma                  | 97  | <400 | IV        |
| 48 | 07709368 | 58 | M | Non-small cell lung cancer                        | 73  | 548  | IV        |
| 49 | 02410882 | 39 | F | Breast cancer                                     | 119 | <400 | III       |
| 50 | 05405434 | 73 | F | Non-Hodgkin's lymphoma                            | 112 | 584  | IV        |
| 51 | 05753621 | 72 | M | Small cell lung cancer                            | 123 | 496  | Extensive |
| 52 | 07846143 | 40 | F | Nasopharyngeal squamous cell                      | 111 | 424  | III       |
| 53 | 07613054 | 63 | M | Non-small cell lung cancer                        | 84  | 7910 | rIV       |
| 54 | 03221140 | 66 | M | Carcinoma of urinary bladder                      | 132 | 2330 | IV        |
| 55 | 04627935 | 53 | M | Lung cancer                                       | 146 | <400 | IV        |
| 56 | 07659113 | 55 | M | Non-small cell lung cancer                        | 98  | 6880 | IV        |
| 57 | 03533316 | 62 | F | Non-small cell lung cancer                        | 128 | <400 | III       |
| 58 | 07846569 | 63 | M | Non-small cell lung cancer                        | 108 | <400 | III       |
| 59 | 07839120 | 49 | M | Non-small cell lung cancer                        | 139 | <400 | IV        |
| 60 | 05520961 | 69 | M | Prostatic cancer                                  | 140 | 458  | IV        |
| 61 | 07612103 | 53 | M | Small cell lung cancer                            | 143 | <400 | Extensive |
| 62 | 07063014 | 49 | M | Nasopharyngeal squamous cell                      | 133 | <400 | III       |
| 63 | 07896361 | 76 | F | Metastasis squamous cell                          | 113 | 790  | III       |
| 64 | 07443529 | 29 | M | Rectum cancer                                     | 125 | <400 | IV        |
| 65 | 05971281 | 52 | M | Small cell lung cancer                            | 85  | <400 | Extensive |
| 66 | 07567916 | 60 | M | Nasopharyngeal squamous cell                      | 122 | 690  | III       |
| 67 | 07828686 | 70 | F | Breast cancer                                     | 149 | 1400 | III       |
| 68 | 05792179 | 38 | M | Laryngo carcinoma                                 | 108 | <400 | III       |
| 69 | 05916328 | 50 | F | Breast cancer                                     | 92  | <400 | rIV       |
| 70 | 07895276 | 60 | F | Esophageal squamous cell cancer                   | 132 | <400 | III       |
| 71 | 05734011 | 49 | M | Laryngo carcinoma                                 | 126 | 1180 | III       |
| 72 | 07793060 | 53 | M | Non-small cell lung cancer                        | 129 | <400 | IV        |
| 73 | 07895366 | 53 | M | Nasopharyngeal squamous cell                      | 109 | 1210 | III       |
| 74 | 07140879 | 48 | M | Non-small cell lung cancer                        | 112 | <400 | IV        |
| 75 | 07442213 | 52 | M | Rectum cancer                                     | 135 | <400 | IIB       |
| 76 | 68103580 | 38 | F | Breast cancer                                     | 118 | <400 | IIIA      |
| 77 | 07321276 | 52 | M | Multiple myeloma                                  | 147 | <400 | III       |
| 78 | 05124803 | 50 | F | Non-small cell lung cancer                        | 127 | 497  | IV        |
| 79 | 06059938 | 72 | M | Non-Hodgkin's lymphoma                            | 137 | 1600 | III       |
| 80 | 07888019 | 70 | M | Nasopharyngeal squamous cell                      | 77  | 8400 | IV        |
| 81 | 06051555 | 63 | M | Non-small cell lung cancer                        | 130 | <400 | III       |
| 82 | 07841848 | 55 | M | Small cell lung cancer                            | 143 | <400 | Extensive |
| 83 | 05105660 | 72 | M | Rectum cancer                                     | 125 | 1540 | rIV       |
| 84 | 07820551 | 67 | M | Non-Hodgkin's lymphoma                            | 74  | 1150 | III       |
| 85 | 07575124 | 60 | F | Non-small cell lung cancer                        | 107 | <400 | rIV       |

|     |          |    |   |                                 |     |      |           |
|-----|----------|----|---|---------------------------------|-----|------|-----------|
| 86  | 07724974 | 30 | F | Carcinoma of submaxillary gland | 98  | 1540 | III       |
| 87  | 04650882 | 37 | M | Nasopharyngeal squamous cell    | 142 | <400 | III       |
| 88  | 05920670 | 51 | M | Laryngo carcinoma               | 138 | <400 | III       |
| 89  | 06053980 | 66 | M | Rectum cancer                   | 118 | 1800 | IV        |
| 90  | 07185514 | 64 | F | Breast cancer                   | 96  | 1130 | IV        |
| 91  | 07647544 | 29 | M | Osteoblastoma                   | 134 | <400 | III       |
| 92  | 07632546 | 42 | M | Nasopharyngeal squamous cell    | 141 | 408  | IV        |
| 93  | 02651458 | 67 | M | Esophageal squamous cell cancer | 88  | <400 | III       |
| 94  | 06069054 | 34 | M | Tongue cancer                   | 89  | 928  | III       |
| 95  | 07880370 | 57 | M | Non-small cell lung cancer      | 144 | 730  | IV        |
| 96  | 05989028 | 49 | M | Esophageal squamous cell cancer | 136 | <400 | III       |
| 97  | 07860785 | 53 | M | Nasopharyngeal squamous cell    | 119 | <400 | III       |
| 98  | 07890643 | 49 | M | Nasopharyngeal squamous cell    | 150 | <400 | III       |
| 99  | 07774183 | 43 | F | Cervical cancer                 | 87  | 1080 | IV        |
| 100 | 07044368 | 70 | F | Melanoma                        | 94  | 803  | rIV       |
| 101 | 05920081 | 81 | F | Ovarian cancer                  | 112 | 6410 | IIIb      |
| 102 | 07869420 | 49 | M | Nasopharyngeal squamous cell    | 113 | 1490 | IV        |
| 103 | 04366533 | 29 | F | Breast cancer                   | 103 | <400 | III       |
| 104 | 07856083 | 68 | M | Laryngo carcinoma               | 107 | <400 | III       |
| 105 | 04801797 | 65 | M | Esophageal squamous cell cancer | 98  | <400 | III       |
| 106 | 07343965 | 51 | M | Renal carcinoma                 | 96  | <400 | rIV       |
| 107 | 07730104 | 52 | F | Ovarian cancer                  | 88  | <400 | IIIb      |
| 108 | 07181329 | 60 | M | Non-small cell lung cancer      | 96  | <400 | IV        |
| 109 | 05688509 | 68 | F | Non-small cell lung cancer      | 135 | 780  | IV        |
| 110 | 07207312 | 41 | M | Small cell lung cancer          | 133 | <400 | Extensive |
| 111 | 07815225 | 65 | M | Non-small cell lung             | 80  | 1920 | IV        |
| 112 | 05689100 | 78 | F | Non-small cell lung cancer      | 93  | 910  | IIIA      |
| 113 | 07810012 | 64 | M | Non-small cell lung cancer      | 126 | <400 | IV        |
| 114 | 05935348 | 60 | M | Non-small cell lung cancer      | 77  | 930  | IV        |
| 115 | 04023326 | 78 | F | Hepatocellular carcinoma        | 97  | 2280 | IV        |
| 116 | 07379305 | 50 | M | Non-small cell lung cancer      | 133 | <400 | IV        |
| 117 | 07903046 | 52 | F | Thyroid carcinoma               | 136 | <400 | II        |
| 118 | 07832602 | 48 | F | Non-small cell lung cancer      | 112 | <400 | IV        |
| 119 | 70009677 | 52 | M | Sinus cancer                    | 124 | <400 | IV        |
| 120 | 07257155 | 50 | F | Ovarian cancer                  | 102 | <400 | IV        |
| 121 | 07645628 | 8  | M | Glioma                          | 138 | 620  | III       |
| 122 | 07764784 | 59 | M | Non-Hodgkin's lymphoma          | 83  | <400 | III       |
| 123 | 04997009 | 58 | M | Rectum carcinoma                | 123 | 410  | rIV       |
| 124 | 07486030 | 63 | M | Non-small cell lung cancer      | 129 | 876  | III       |
| 125 | 07461780 | 56 | M | Non-small cell lung cancer      | 123 | 600  | IV        |
| 126 | 07811295 | 64 | M | Non-small cell lung cancer      | 104 | 2000 | IV        |
| 127 | 07837308 | 52 | M | Non-small cell lung             | 142 | <400 | III       |
| 128 | 07609270 | 10 | F | Intracranial germinomas         | 85  | <400 | rIII      |
| 129 | 07778200 | 51 | M | Esophageal squamous cell cancer | 95  | <400 | III       |
| 130 | 07316014 | 55 | M | Small cell lung cancer          | 89  | <400 | Extensive |
| 131 | 07502501 | 49 | F | Cholangiocellular carcinoma;    | 95  | 799  | rIV       |
| 132 | 07895716 | 53 | M | Non-small cell lung cancer      | 145 | <400 | IV        |
| 133 | 07830955 | 75 | F | Peritoneal carcinoma            | 82  | 3490 | III       |
| 134 | 07895402 | 52 | M | Nasopharyngeal squamous cell    | 140 | 520  | IV        |

|     |          |    |   |                                 |     |       |      |
|-----|----------|----|---|---------------------------------|-----|-------|------|
| 135 | 03320072 | 62 | M | Non-small cell lung cancer      | 121 | 458   | rIV  |
| 136 | 07577962 | 56 | M | Non-small cell lung cancer      | 132 | 554   | IIIb |
| 137 | 02888053 | 72 | M | Non-small cell lung cancer      | 91  | <400  | III  |
| 138 | 07903283 | 69 | M | Tongue cancer                   | 137 | 502   | III  |
| 139 | 07846087 | 66 | F | Esophageal squamous cell cancer | 110 | 3010  | III  |
| 140 | 07896281 | 56 | F | Non-small cell lung cancer      | 111 | <400  | III  |
| 141 | 04228779 | 63 | F | Nasopharyngeal squamous cell    | 126 | 1440  | III  |
| 142 | 0160065  | 64 | M | Nasopharyngeal squamous cell    | 117 | 1070  | rIV  |
| 143 | 07899027 | 63 | M | Non-small cell lung cancer      | 112 | <400  | IV   |
| 144 | 04462246 | 34 | M | Nasopharyngeal squamous cell    | 102 | <400  | IV   |
| 145 | 05862096 | 48 | F | Non-small cell lung cancer      | 85  | <400  | IV   |
| 146 | 07498447 | 58 | M | Non-small cell lung cancer      | 79  | 932   | IV   |
| 147 | 06029263 | 43 | M | Non-small cell lung cancer      | 72  | 4300  | III  |
| 148 | 07221093 | 64 | M | Rectum cancer                   | 55  | 935   | IV   |
| 149 | 05679611 | 47 | M | Nasopharyngeal squamous cell    | 85  | 7710  | III  |
| 150 | 07911662 | 71 | F | Rectum cancer                   | 77  | 752   | III  |
| 151 | 07483019 | 64 | M | Rectum cancer                   | 65  | <400  | III  |
| 152 | 07888019 | 70 | M | Nasopharyngeal squamous cell    | 62  | 4020  | III  |
| 153 | 07316014 | 55 | M | Non-small cell lung             | 54  | <400  | IIIB |
| 154 | 07585360 | 72 | F | Esophageal squamous cell cancer | 68  | 693   | III  |
| 155 | 06038755 | 70 | M | Non-small cell lung cancer      | 62  | 593   | IV   |
| 156 | 04801797 | 65 | M | Esophageal squamous cell cancer | 76  | <400  | IV   |
| 157 | 06017371 | 46 | F | Breast cancer                   | 65  | <400  | III  |
| 158 | 06202415 | 51 | M | Non-small cell lung cancer      | 51  | 730   | IV   |
| 159 | 00031631 | 59 | M | Esophageal squamous cell cancer | 62  | 1710  | III  |
| 160 | 03912538 | 54 | M | Non-small cell lung cancer      | 65  | 1630  | III  |
| 161 | 08221390 | 54 | F | Cervical carcinoma              | 67  | 1440  | IV   |
| 162 | 00237414 | 53 | M | Esophageal squamous cell cancer | 71  | 1060  | IV   |
| 163 | 07418835 | 62 | M | Non-small cell lung cancer      | 74  | 3120  | III  |
| 164 | 08229641 | 78 | F | Rectum cancer                   | 74  | 5050  | IV   |
| 165 | 04676514 | 66 | F | Non-small cell lung             | 77  | 9100  | III  |
| 166 | 05984900 | 60 | M | Non-small cell lung cancer      | 78  | <400  | III  |
| 167 | 05700972 | 51 | M | Hepatocellular carcinoma        | 57  | 11500 | IV   |

**Supplementary Table 2.** Clinical information for the 5 healthy donor and 41 patients with different types of malignant tumors used to study EPC frequency in peripheral blood (Fig. 4e-g and i).

| No | ID       | Age | Gender | Diagnosis                                         | Hb(g/L) | Stage |
|----|----------|-----|--------|---------------------------------------------------|---------|-------|
| 1  | 07612059 | 46  | F      | Nasopharyngeal carcinoma                          | 53      | III   |
| 1  | 07612059 | 46  | F      | Nasopharyngeal carcinoma                          | 53      | III   |
| 2  | 07408347 | 58  | M      | Diffuse large B-cell lymphoma                     | 63      | III   |
| 3  | 05108828 | 57  | F      | Pleomorphic liposarcoma of the peritoneum         | 67      | III   |
| 4  | 05994934 | 64  | M      | Primary bronchogenic lung cancer                  | 74      | IV    |
| 5  | 07337183 | 69  | M      | Lung squamous cell carcinoma                      | 77      | IV    |
| 6  | 07708983 | 20  | F      | Mediastinal malignant germ cell tumors            | 78      | III   |
| 7  | 07737176 | 61  | M      | Lung sarcomatoid carcinoma                        | 81      | III   |
| 8  | 07622038 | 27  | F      | Tonsillar lymphoma                                | 85      | III   |
| 9  | 07531718 | 48  | F      | Primary bronchogenic lung cancer                  | 88      | III   |
| 10 | 07673672 | 69  | M      | Diffuse large B-cell lymphoma                     | 88      | III   |
| 11 | 05152855 | 64  | F      | Primary bronchial adenocarcinoma of the lung      | 88      | IV    |
| 12 | 07277665 | 46  | F      | Primary bronchogenic lung squamous cell carcinoma | 89      | III   |
| 13 | 07468522 | 68  | F      | Diffuse large B-cell lymphoma                     | 89      | III   |
| 14 | 05310357 | 71  | M      | Lung adenocarcinoma                               | 90      | III   |
| 15 | 01201637 | 70  | F      | Lung squamous cell carcinoma                      | 92      | IV    |
| 16 | 05908951 | 53  | M      | Left breast infiltrating ductal carcinoma         | 93      | IV    |
| 17 | 05992241 | 34  | M      | Gastric adenocarcinoma                            | 95      | IV    |
| 18 | 07219424 | 52  | M      | Lung adenocarcinoma                               | 98      | III   |
| 19 | 07658793 | 55  | F      | Gallbladder cancer                                | 98      | III   |
| 20 | 07701980 | 79  | F      | Lung adenocarcinoma                               | 109     | III   |
| 21 | 05991279 | 52  | M      | Primary bronchial small cell lung cancer          | 107     | III   |
| 22 | 05689100 | 32  | F      | Primary bronchial adenocarcinoma of the lung      | 105     | IV    |
| 23 | 05898617 | 66  | F      | Primary bronchial adenocarcinoma of the lung      | 99      | III   |
| 24 | 00945960 | 64  | F      | Tongue squamous cell carcinoma                    | 93      | III   |
| 25 | 05905574 | 42  | F      | Nasopharyngeal squamous cell                      | 100     | III   |
| 26 | 07672747 | 46  | M      | Colon cancer                                      | 109     | IV    |
| 27 | 07564619 | 63  | M      | Primary bronchial small cell lung cancer          | 108     | III   |
| 28 | 07215539 | 75  | M      | Non-Hodgkin's lymphoma                            | 105     | III   |
| 29 | 07626046 | 58  | M      | Primary bronchogenic lung squamous cell carcinoma | 103     | III   |
| 30 | 07623835 | 60  | F      | Small cell lung cancer                            | 110     | IV    |
| 31 | 07679195 | 36  | M      | Pelvic malignancy                                 | 150     | IV    |
| 32 | 07500671 | 52  | F      | Cervical squamous cell carcinoma                  | 139     | IIIB  |
| 33 | 06008744 | 59  | F      | Cervical squamous cell carcinoma                  | 138     | IIIB  |
| 34 | 07497250 | 65  | F      | Primary bronchogenic lung squamous cell carcinoma | 126     | III   |
| 35 | 07188428 | 49  | M      | Duodenal adenocarcinoma                           | 136     | III   |
| 36 | 07535269 | 69  | M      | Hodgkin 's lymphoma                               | 127     | III   |
| 37 | 04083507 | 70  | M      | Left breast infiltrating ductal carcinoma         | 133     | III   |
| 38 | 05724108 | 49  | F      | Primary bronchial adenocarcinoma of the lung      | 117     | IV    |
| 39 | 07547089 | 54  | F      | Nasopharyngeal squamous cell                      | 119     | IV    |
| 40 | 07273674 | 74  | M      | Small cell lung cancer                            | 132     | III   |

|    |          |    |   |                        |     |      |
|----|----------|----|---|------------------------|-----|------|
| 41 | 07587762 | 55 | F | Small cell lung cancer | 125 | IV   |
| 42 | None     | 31 | M | Health donner          | 125 | None |
| 43 | None     | 27 | M | Health donner          | 133 | None |
| 44 | None     | 24 | F | Health donner          | 134 | None |
| 45 | None     | 28 | F | Health donner          | 136 | None |
| 46 | None     | 28 | M | Health donner          | 127 | None |



**Supplementary Table 3.** Clinical information for with the 15 cancer patients used to study the inhibitory effects of CD45<sup>+</sup> and CD45<sup>-</sup> EPCs on CD8<sup>+</sup> T cell function (Fig. 4h, j-n).

| <b>No.</b> | <b>ID</b> | <b>Age</b> | <b>Gender</b> | <b>Diagnosis</b>                                  | <b>Hb(g/L)</b> | <b>Stage</b> |
|------------|-----------|------------|---------------|---------------------------------------------------|----------------|--------------|
| 1          | 05108828  | 57         | F             | Pleomorphic liposarcoma of the peritoneum         | 67             | III          |
| 2          | 05994934  | 64         | M             | Primary bronchogenic lung cancer                  | 74             | IV           |
| 3          | 07337183  | 69         | M             | Lung squamous cell carcinoma                      | 77             | IV           |
| 4          | 07708983  | 20         | F             | Mediastinal malignant germ cell tumors            | 78             | III          |
| 5          | 07531718  | 48         | F             | Primary bronchogenic lung cancer                  | 88             | III          |
| 6          | 05152855  | 64         | F             | Primary bronchial adenocarcinoma of the lung      | 88             | IV           |
| 7          | 07277665  | 46         | F             | Primary bronchogenic lung squamous cell carcinoma | 89             | III          |
| 8          | 05310357  | 71         | M             | Lung adenocarcinoma                               | 90             | III          |
| 9          | 01201637  | 70         | F             | Lung squamous cell carcinoma                      | 92             | IV           |
| 10         | 05908951  | 53         | M             | Left breast infiltrating ductal carcinoma         | 93             | IV           |
| 11         | 05992241  | 34         | M             | Gastric adenocarcinoma                            | 95             | IV           |
| 12         | 07219424  | 52         | M             | Lung adenocarcinoma                               | 98             | III          |
| 13         | 07658793  | 55         | F             | Gallbladder cancer                                | 98             | III          |
| 14         | 07701980  | 79         | F             | Lung adenocarcinoma                               | 109            | III          |
| 15         | 05991279  | 52         | M             | Primary bronchial small cell lung cancer          | 107            | III          |

**Supplementary Table 4.** Primer sequences used for RT-qPCR.

| <b>Gene</b> | <b>Forward</b>          | <b>Reverse</b>          |
|-------------|-------------------------|-------------------------|
| human Fes   | AGGACCGTGACAAGGCTAAG    | CCTTCAGGATGCAAGCCATCT   |
| human Glrx  | CCCATCAAACAAGGGCTTCTG   | CTGCATCCGCCTATACAATCTT  |
| human Gpx3  | AGAGCCGGGGACAAGAGAA     | ATTGCCAGCATACTGCTTGA    |
| human Gpx4  | GAGGCAAGACCGAAGTAAACTAC | CCGAACTGGTTACACGGGAA    |
| human Gsr   | CACTTGCGTGAATGTTGGATG   | TGGGATCACTCGTGAAGGCT    |
| human Mgst1 | ATGACAGAGTAGAACGTGTACGC | TACAGGAGGCCAATTCCAAGA   |
| human Mpo   | TGCTGCCCTTTGACAACCTG    | TGCTCCCGAAGTAAGAGGGT    |
| human msra  | GGCCATCTACCCGACCTCT     | GCCATIGGGGTTCTTGCTCA    |
| human prnp  | AGTCAGTGGAACAAGCCGAG    | CTGCCGAAATGTAIGATGGGC   |
| human cybb  | CACAGGCCTGAAACAAAAGA    | GCTTCAGGTCCACA GAGGAA.  |
| mouse cybb  | TGTGGTTGGGGCTGAATGTC    | CTGAGAAAGGAGAGCAGATTTCG |
